# Supplementary material for: How MicroRNA and Transcription Factor Co-regulatory Networks Affect Osteosarcoma Cell Proliferation
Source: PubMed Central journal article supplement (PMC3757060; doi:10.1371/journal.pcbi.1003210), 2013-08-29

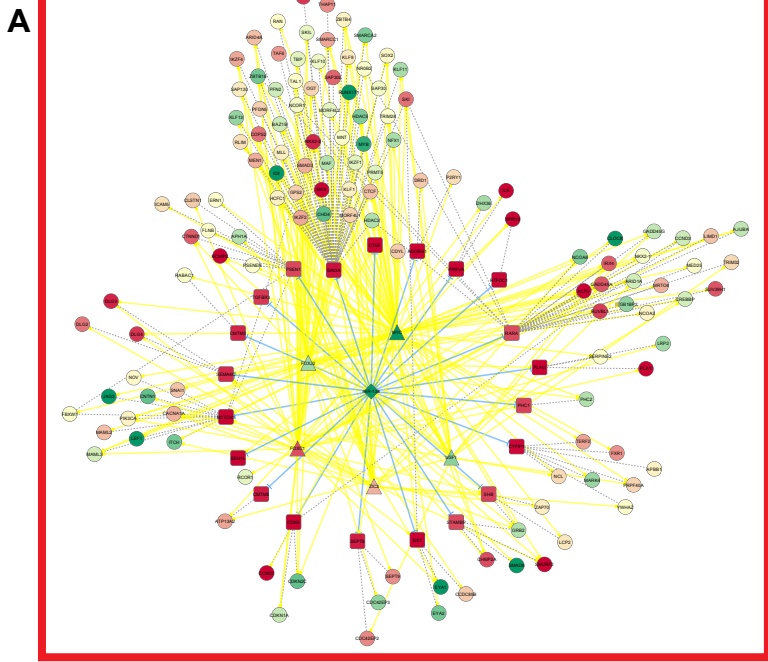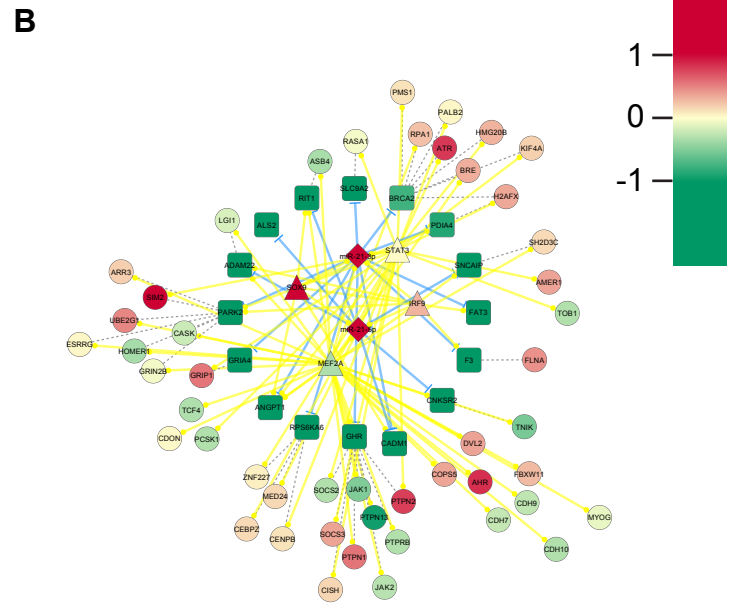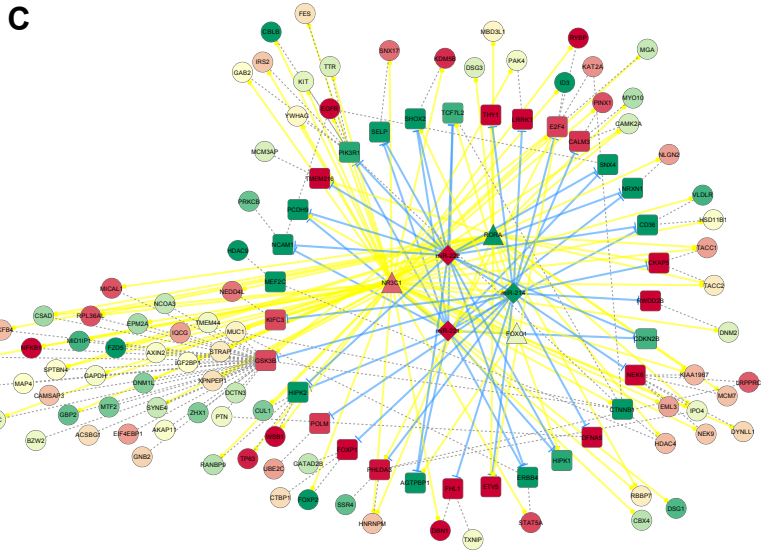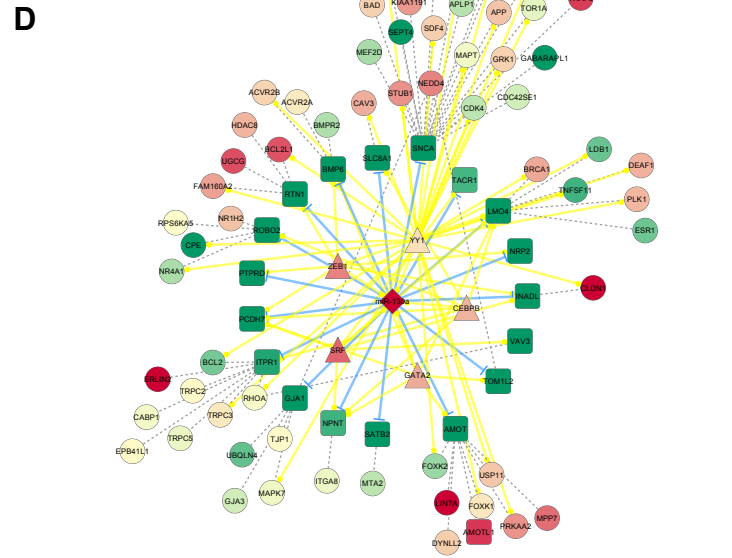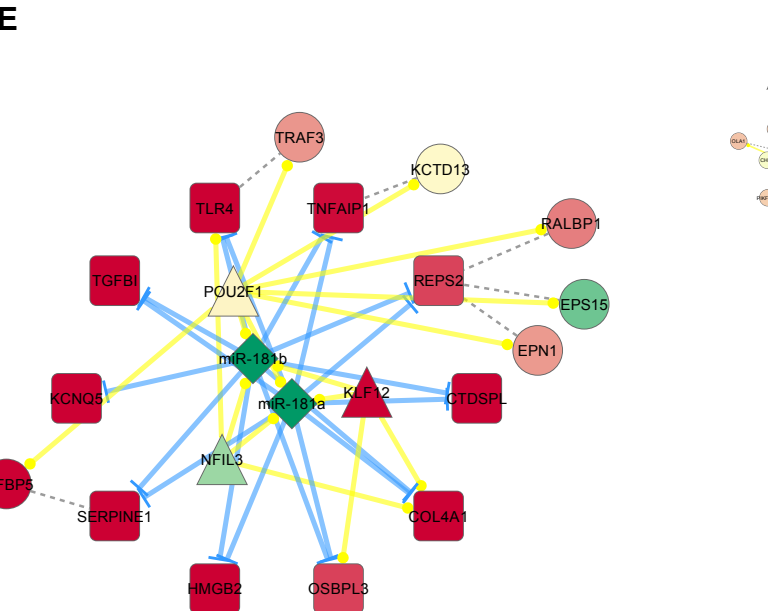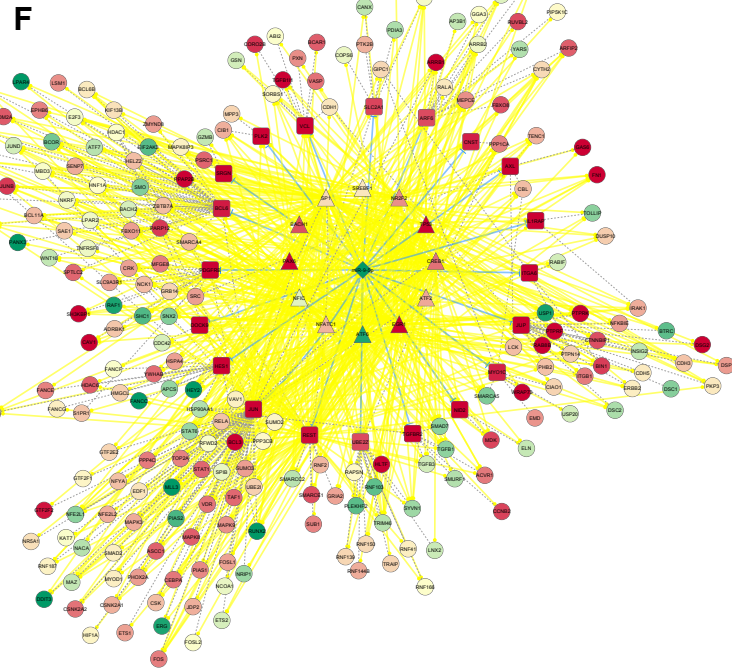

Supplement: pcbi.1003210.s005.pdf [file pcbi.1003210.s005.pdf]
