# Supplementary material for: How MicroRNA and Transcription Factor Co-regulatory Networks Affect Osteosarcoma Cell Proliferation
Source: PLoS Comput Biol. 2013 Aug 29;9(8):e1003210. doi: 10.1371/journal.pcbi.1003210 (PMC3757060; doi:10.1371/journal.pcbi.1003210)
Supplement: Table S4 — Individual microRNA and TF co-regulatory 3-node and 4-node motifs of C1. (XLS) [file pcbi.1003210.s011.xls]

## Sheet: TableS4
Motif	TF (geneid)	TF (symbol)	miR	primary target (geneid)	primary target (symbol)	secondary target (geneid)	secondary target (symbol)
3-node FFL	1386	ATF2	hsa-miR-181a	2806	GOT2	---	---
	1386	ATF2	hsa-miR-181b	2806	GOT2	---	---
	1386	ATF2	hsa-miR-181a	8864	RTCD1	---	---
	1386	ATF2	hsa-miR-181b	8864	RTCD1	---	---
	1386	ATF2	hsa-miR-181a	63898	SH2D4A	---	---
	1386	ATF2	hsa-miR-181b	63898	SH2D4A	---	---
	22926	ATF6	hsa-miR-130a	1390	CREM	---	---
	22926	ATF6	hsa-miR-130a	57520	HECW2	---	---
	22926	ATF6	hsa-miR-130a	3097	HIVEP2	---	---
	22926	ATF6	hsa-miR-130a	58508	MLL3	---	---
	2186	BPTF	hsa-miR-214	56970	ATXN7L3	---	---
	2186	BPTF	hsa-miR-214	8892	EIF2B2	---	---
	2186	BPTF	hsa-miR-214	2948	GSTM4	---	---
	2186	BPTF	hsa-miR-214	5292	PIM1	---	---
	2186	BPTF	hsa-miR-214	9230	RAB11B	---	---
	2186	BPTF	hsa-miR-214	8871	SYNJ2	---	---
	1051	CEBPB	hsa-miR-130a	57520	HECW2	---	---
	1051	CEBPB	hsa-miR-130a	3097	HIVEP2	---	---
	1051	CEBPB	hsa-miR-130a	4642	MYO1D	---	---
	3297	HSF1	hsa-miR-130a	57520	HECW2	---	---
	3297	HSF1	hsa-miR-130a	3097	HIVEP2	---	---
	3297	HSF1	hsa-miR-130a	8634	RTCD1	---	---
	3298	HSF2	hsa-miR-130a	178	AGL	---	---
	3298	HSF2	hsa-miR-130a	57520	HECW2	---	---
	3298	HSF2	hsa-miR-130a	3097	HIVEP2	---	---
	3725	JUN	hsa-miR-222	58155	PTBP2	---	---
	3725	JUN	hsa-miR-221	58155	PTBP2	---	---
	3725	JUN	hsa-miR-222	23012	STK38L	---	---
	3725	JUN	hsa-miR-221	23012	STK38L	---	---
	3725	JUN	hsa-miR-21-5p	23012	STK38L	---	---
	3725	JUN	hsa-miR-21-5p	6909	TBX2	---	---
	3725	JUN	hsa-miR-222	22797	TFEC	---	---
	3725	JUN	hsa-miR-221	22797	TFEC	---	---
	11278	KLF12	hsa-miR-138	408	ARRB1	---	---
	11278	KLF12	hsa-miR-138	274	BIN1	---	---
	11278	KLF12	hsa-miR-138	58190	CTDSP1	---	---
	11278	KLF12	hsa-miR-138	5069	PAPPA	---	---
	11278	KLF12	hsa-miR-138	23471	TRAM1	---	---
	11278	KLF12	hsa-miR-138	22882	ZHX2	---	---
	4205	MEF2A	hsa-miR-181b	157570	ESCO2	---	---
	4205	MEF2A	hsa-miR-181a	157570	ESCO2	---	---
	4205	MEF2A	hsa-miR-181b	3224	HOXC8	---	---
	4205	MEF2A	hsa-miR-181a	3224	HOXC8	---	---
	4205	MEF2A	hsa-miR-181b	54891	INO80D	---	---
	4205	MEF2A	hsa-miR-181a	54891	INO80D	---	---
	4205	MEF2A	hsa-miR-181b	1316	KLF6	---	---
	4205	MEF2A	hsa-miR-181a	1316	KLF6	---	---
	4205	MEF2A	hsa-miR-181b	27097	TAF5L	---	---
	4205	MEF2A	hsa-miR-181a	27097	TAF5L	---	---
	4205	MEF2A	hsa-miR-181b	9519	TBPL1	---	---
	4205	MEF2A	hsa-miR-181a	9519	TBPL1	---	---
	4205	MEF2A	hsa-miR-181b	22906	TRAK1	---	---
	4205	MEF2A	hsa-miR-181a	22906	TRAK1	---	---
	4609	MYC	hsa-miR-138	9915	ARNT2	---	---
	4609	MYC	hsa-miR-138	55502	HES6	---	---
	4609	MYC	hsa-miR-138	9397	NMT2	---	---
	4609	MYC	hsa-miR-138	9060	PAPSS2	---	---
	4609	MYC	hsa-miR-138	63898	SH2D4A	---	---
	4609	MYC	hsa-miR-138	6493	SIM2	---	---
	4609	MYC	hsa-miR-138	9655	SOCS5	---	---
	4609	MYC	hsa-miR-138	90843	TCEAL8	---	---
	4609	MYC	hsa-miR-138	7247	TSN	---	---
	4609	MYC	hsa-miR-138	22882	ZHX2	---	---
	4783	NFIL3	hsa-miR-214	1408	CRY2	---	---
	4783	NFIL3	hsa-miR-214	55224	ETNK2	---	---
	4783	NFIL3	hsa-miR-214	2806	GOT2	---	---
	4783	NFIL3	hsa-miR-214	5891	RAGE	---	---
	5451	POU2F1	hsa-miR-21-5p	225	ABCD2	---	---
	5451	POU2F1	hsa-miR-181a	9915	ARNT2	---	---
	5451	POU2F1	hsa-miR-181b	9915	ARNT2	---	---
	5451	POU2F1	hsa-miR-181a	1615	DARS	---	---
	5451	POU2F1	hsa-miR-181b	1615	DARS	---	---
	5451	POU2F1	hsa-miR-21-5p	1746	DLX2	---	---
	5451	POU2F1	hsa-miR-181a	54891	INO80D	---	---
	5451	POU2F1	hsa-miR-181b	54891	INO80D	---	---
	5451	POU2F1	hsa-miR-21-5p	55885	LMO3	---	---
	5451	POU2F1	hsa-miR-21-3p	55885	LMO3	---	---
	5451	POU2F1	hsa-miR-21-3p	5165	PDK3	---	---
	5451	POU2F1	hsa-miR-181a	5523	PPP2R3A	---	---
	5451	POU2F1	hsa-miR-181b	5523	PPP2R3A	---	---
	5451	POU2F1	hsa-miR-181a	22906	TRAK1	---	---
	5451	POU2F1	hsa-miR-181b	22906	TRAK1	---	---
	6720	SREBF1	hsa-miR-181a	2120	ETV6	---	---
	6720	SREBF1	hsa-miR-181b	2120	ETV6	---	---
	6720	SREBF1	hsa-miR-181a	10644	IGF2BP2	---	---
	6720	SREBF1	hsa-miR-181b	10644	IGF2BP2	---	---
	6720	SREBF1	hsa-miR-181a	54891	INO80D	---	---
	6720	SREBF1	hsa-miR-181b	54891	INO80D	---	---
	6720	SREBF1	hsa-miR-181a	1316	KLF6	---	---
	6720	SREBF1	hsa-miR-181b	1316	KLF6	---	---
	6720	SREBF1	hsa-miR-181a	63898	SH2D4A	---	---
	6720	SREBF1	hsa-miR-181b	63898	SH2D4A	---	---
	6722	SRF	hsa-miR-21-5p	225	ABCD2	---	---
	6722	SRF	hsa-miR-21-5p	3078	CFHR1	---	---
	6722	SRF	hsa-miR-130a	27252	KLHL20	---	---
	6722	SRF	hsa-miR-130a	4642	MYO1D	---	---
	6908	TBP	hsa-miR-181b	6314	ATXN7	---	---
	6908	TBP	hsa-miR-181b	1615	DARS	---	---
	6935	ZEB1	hsa-miR-130a	57520	HECW2	---	---
	6935	ZEB1	hsa-miR-130a	4642	MYO1D	---	---
	6935	ZEB1	hsa-miR-130a	9686	VGLL4	---	---
	7546	ZIC2	hsa-miR-214	56970	ATXN7L3	---	---
	7546	ZIC2	hsa-miR-9-5p	8110	DPF3	---	---
	7546	ZIC2	hsa-miR-214	8892	EIF2B2	---	---
	7546	ZIC2	hsa-miR-214	55224	ETNK2	---	---
	7546	ZIC2	hsa-miR-9-5p	10644	IGF2BP2	---	---
	7546	ZIC2	hsa-miR-214	5069	PAPPA	---	---
	7546	ZIC2	hsa-miR-214	5141	PDE4A	---	---
	7546	ZIC2	hsa-miR-9-5p	9655	SOCS5	---	---
	7546	ZIC2	hsa-miR-214	9655	SOCS5	---	---
4-node FFL	4783	NFIL3	hsa-miR-214	9519	TBPL1	387332	TBPL2
	1386	ATF2	hsa-miR-9-5p	11160	ERLIN2	10613	ERLIN1
	1386	ATF2	hsa-miR-9-5p	11160	ERLIN2	3396	ICT1
	1386	ATF2	hsa-miR-9-5p	11160	ERLIN2	84447	SYVN1
	1386	ATF2	hsa-miR-9-5p	11160	ERLIN2	83590	TMUB1
	1386	ATF2	hsa-miR-9-5p	8968	HIST2H3A	5252	PHF1
	1386	ATF2	hsa-miR-9-5p	10644	IGF2BP2	3396	ICT1
	1386	ATF2	hsa-miR-9-5p	10644	IGF2BP2	56257	MEPCE
	1386	ATF2	hsa-miR-9-5p	688	KLF5	2962	GTF2F1
	1386	ATF2	hsa-miR-9-5p	688	KLF5	5914	RARA
	1386	ATF2	hsa-miR-9-5p	4790	NFKB1	1051	CEBPB
	1386	ATF2	hsa-miR-9-5p	4790	NFKB1	9759	HDAC4
	1386	ATF2	hsa-miR-9-5p	4790	NFKB1	10524	KAT5
	1386	ATF2	hsa-miR-9-5p	4790	NFKB1	4221	MEN1
	1386	ATF2	hsa-miR-9-5p	4790	NFKB1	2908	NR3C1
	1386	ATF2	hsa-miR-9-5p	4790	NFKB1	5970	RELA
	1386	ATF2	hsa-miR-9-5p	4790	NFKB1	5971	RELB
	1386	ATF2	hsa-miR-9-5p	4790	NFKB1	7536	SF1
	1386	ATF2	hsa-miR-9-5p	4790	NFKB1	6774	STAT3
	1386	ATF2	hsa-miR-9-5p	4790	NFKB1	7158	TP53BP1
	1386	ATF2	hsa-miR-9-5p	114971	PTPMT1	5597	MAPK6
	1386	ATF2	hsa-miR-9-5p	9519	TBPL1	2957	GTF2A1
	1386	ATF2	hsa-miR-9-5p	9519	TBPL1	3313	HSPA9
	1386	ATF2	hsa-miR-9-5p	54532	USP53	847	CAT
	1386	ATF2	hsa-miR-9-5p	54532	USP53	3054	HCFC1
	1386	ATF2	hsa-miR-9-5p	6940	ZNF354A	9759	HDAC4
	571	BACH1	hsa-miR-9-5p	11160	ERLIN2	10613	ERLIN1
	571	BACH1	hsa-miR-9-5p	11160	ERLIN2	3708	ITPR1
	571	BACH1	hsa-miR-9-5p	11160	ERLIN2	84447	SYVN1
	571	BACH1	hsa-miR-9-5p	11160	ERLIN2	83590	TMUB1
	571	BACH1	hsa-miR-9-5p	10644	IGF2BP2	56257	MEPCE
	571	BACH1	hsa-miR-9-5p	688	KLF5	7706	TRIM25
	571	BACH1	hsa-miR-9-5p	4790	NFKB1	1191	CLU
	571	BACH1	hsa-miR-9-5p	4790	NFKB1	1997	ELF1
	571	BACH1	hsa-miR-9-5p	4790	NFKB1	10014	HDAC5
	571	BACH1	hsa-miR-9-5p	4790	NFKB1	23421	ITGB3BP
	571	BACH1	hsa-miR-9-5p	4790	NFKB1	10524	KAT5
	571	BACH1	hsa-miR-9-5p	4790	NFKB1	4791	NFKB2
	571	BACH1	hsa-miR-9-5p	4790	NFKB1	64332	NFKBIZ
	571	BACH1	hsa-miR-9-5p	4790	NFKB1	4792	NKBIA
	571	BACH1	hsa-miR-9-5p	4790	NFKB1	5970	RELA
	571	BACH1	hsa-miR-9-5p	4790	NFKB1	6667	SP1
	571	BACH1	hsa-miR-9-5p	4790	NFKB1	6778	STAT6
	571	BACH1	hsa-miR-9-5p	4790	NFKB1	79931	TNIP3
	571	BACH1	hsa-miR-9-5p	9519	TBPL1	2957	GTF2A1
	571	BACH1	hsa-miR-9-5p	9519	TBPL1	3313	HSPA9
	571	BACH1	hsa-miR-9-5p	54532	USP53	642	BLMH
	571	BACH1	hsa-miR-9-5p	54532	USP53	1475	CSTA
	571	BACH1	hsa-miR-9-5p	54532	USP53	2318	FLNC
	1385	CREB1	hsa-miR-9-5p	11160	ERLIN2	267	AMFR
	1385	CREB1	hsa-miR-9-5p	11160	ERLIN2	11236	CBX3
	1385	CREB1	hsa-miR-9-5p	11160	ERLIN2	10613	ERLIN1
	1385	CREB1	hsa-miR-9-5p	11160	ERLIN2	84447	SYVN1
	1385	CREB1	hsa-miR-9-5p	10644	IGF2BP2	56257	MEPCE
	1385	CREB1	hsa-miR-9-5p	4790	NFKB1	8945	BTRC
	1385	CREB1	hsa-miR-9-5p	4790	NFKB1	1051	CEBPB
	1385	CREB1	hsa-miR-9-5p	4790	NFKB1	9759	HDAC4
	1385	CREB1	hsa-miR-9-5p	4790	NFKB1	10524	KAT5
	1385	CREB1	hsa-miR-9-5p	4790	NFKB1	688	KLF5
	1385	CREB1	hsa-miR-9-5p	4790	NFKB1	4221	MEN1
	1385	CREB1	hsa-miR-9-5p	4790	NFKB1	23054	NCOA6
	1385	CREB1	hsa-miR-9-5p	4790	NFKB1	9611	NCOR1
	1385	CREB1	hsa-miR-9-5p	4790	NFKB1	4791	NFKB2
	1385	CREB1	hsa-miR-9-5p	4790	NFKB1	4794	NFKBIE
	1385	CREB1	hsa-miR-9-5p	4790	NFKB1	64332	NFKBIZ
	1385	CREB1	hsa-miR-9-5p	4790	NFKB1	2908	NR3C1
	1385	CREB1	hsa-miR-9-5p	4790	NFKB1	5531	PPP4C
	1385	CREB1	hsa-miR-9-5p	4790	NFKB1	5970	RELA
	1385	CREB1	hsa-miR-9-5p	4790	NFKB1	7536	SF1
	1385	CREB1	hsa-miR-9-5p	4790	NFKB1	6667	SP1
	1385	CREB1	hsa-miR-9-5p	4790	NFKB1	7158	TP53BP1
	1385	CREB1	hsa-miR-9-5p	9655	SOCS5	238	ALK
	1385	CREB1	hsa-miR-9-5p	9519	TBPL1	2957	GTF2A1
	1385	CREB1	hsa-miR-9-5p	9519	TBPL1	6872	TAF1
	1385	CREB1	hsa-miR-9-5p	9519	TBPL1	6877	TAF5
	1385	CREB1	hsa-miR-9-5p	9519	TBPL1	7014	TERF2
	1385	CREB1	hsa-miR-9-5p	54532	USP53	642	BLMH
	1385	CREB1	hsa-miR-9-5p	54532	USP53	2318	FLNC
	1385	CREB1	hsa-miR-9-5p	54532	USP53	2885	GRB2
	1385	CREB1	hsa-miR-9-5p	54532	USP53	3054	HCFC1
	1385	CREB1	hsa-miR-9-5p	54532	USP53	10111	RAD50
	1385	CREB1	hsa-miR-9-5p	6940	ZNF354A	9759	HDAC4
	1869	E2F1	hsa-miR-21-3p	9134	CCNE2	1017	CDK2
	1869	E2F1	hsa-miR-21-3p	9134	CCNE2	55294	FBXW7
	1869	E2F1	hsa-miR-21-3p	9134	CCNE2	6612	SUMO2
	1869	E2F1	hsa-miR-21-3p	90293	KLHL13	10980	COPS6
	1869	E2F1	hsa-miR-21-3p	90293	KLHL13	9903	KLHL21
	1869	E2F1	hsa-miR-21-3p	90293	KLHL13	29761	USP25
	1869	E2F1	hsa-miR-21-5p	55885	LMO3	2553	GABPB1
	1869	E2F1	hsa-miR-21-3p	55885	LMO3	2553	GABPB1
	1869	E2F1	hsa-miR-21-5p	55885	LMO3	8861	LDB1
	1869	E2F1	hsa-miR-21-3p	55885	LMO3	8861	LDB1
	1869	E2F1	hsa-miR-21-5p	55885	LMO3	4188	MDFI
	1869	E2F1	hsa-miR-21-3p	55885	LMO3	4188	MDFI
	1869	E2F1	hsa-miR-21-5p	55885	LMO3	138046	RALYL
	1869	E2F1	hsa-miR-21-3p	55885	LMO3	138046	RALYL
	1869	E2F1	hsa-miR-21-5p	55885	LMO3	222546	RFX6
	1869	E2F1	hsa-miR-21-3p	55885	LMO3	222546	RFX6
	1869	E2F1	hsa-miR-21-5p	5606	MAP2K3	4092	SMAD7
	1869	E2F1	hsa-miR-21-3p	5606	MAP2K3	4092	SMAD7
	1869	E2F1	hsa-miR-21-5p	5606	MAP2K3	9344	TAOK2
	1869	E2F1	hsa-miR-21-3p	5606	MAP2K3	9344	TAOK2
	1869	E2F1	hsa-miR-21-3p	8569	MKNK1	1387	CREBBP
	1869	E2F1	hsa-miR-21-3p	23133	PHF8	7552	ZNF711
	1869	E2F1	hsa-miR-21-3p	22843	PPM1E	23043	TNIK
	1869	E2F1	hsa-miR-21-5p	23012	STK38L	3881	KRT31
	1869	E2F1	hsa-miR-21-3p	23012	STK38L	3881	KRT31
	1869	E2F1	hsa-miR-21-3p	9406	ZRANB2	2010	EMD
	1869	E2F1	hsa-miR-21-3p	9406	ZRANB2	3068	HDGF
	1874	E2F4	hsa-miR-214	219	ALDH1B1	4609	MYC
	1874	E2F4	hsa-miR-214	9915	ARNT2	266743	NPAS4
	1874	E2F4	hsa-miR-214	58190	CTDSP1	83461	CDCA3
	1874	E2F4	hsa-miR-214	58190	CTDSP1	5430	POLR2A
	1874	E2F4	hsa-miR-214	11083	DIDO1	3190	HNRNPK
	1874	E2F4	hsa-miR-214	11083	DIDO1	6426	SFRS1
	1874	E2F4	hsa-miR-214	11083	DIDO1	11059	WWP1
	1874	E2F4	hsa-miR-214	11083	DIDO1	11060	WWP2
	1874	E2F4	hsa-miR-214	8892	EIF2B2	7203	CCT3
	1874	E2F4	hsa-miR-214	9570	GOSR2	6811	STX5
	1874	E2F4	hsa-miR-214	2806	GOT2	2597	GAPDH
	1874	E2F4	hsa-miR-214	4286	MITF	2353	FOS
	1874	E2F4	hsa-miR-214	4286	MITF	8554	PIAS1
	1874	E2F4	hsa-miR-214	5069	PAPPA	3014	H2AFX
	1874	E2F4	hsa-miR-214	5292	PIM1	993	CDC25A
	1874	E2F4	hsa-miR-214	5292	PIM1	1026	CDKN1A
	1874	E2F4	hsa-miR-214	5292	PIM1	11335	LOC644101
	1874	E2F4	hsa-miR-214	5292	PIM1	4609	MYC
	1874	E2F4	hsa-miR-214	5292	PIM1	6470	SHMT1
	1874	E2F4	hsa-miR-214	9230	RAB11B	3014	H2AFX
	1874	E2F4	hsa-miR-214	9230	RAB11B	80223	RAB11FIP1
	1874	E2F4	hsa-miR-214	9230	RAB11B	26056	RAB11FIP5
	1874	E2F4	hsa-miR-214	5891	RAGE	5597	MAPK6
	1874	E2F4	hsa-miR-214	8871	SYNJ2	2885	GRB2
	1874	E2F4	hsa-miR-214	9519	TBPL1	2957	GTF2A1
	1874	E2F4	hsa-miR-214	9519	TBPL1	6878	TAF6
	1874	E2F4	hsa-miR-214	22906	TRAK1	8473	OGT
	2296	FOXC1	hsa-miR-222	22926	ATF6	4802	NFYC
	2296	FOXC1	hsa-miR-222	1390	CREM	6908	TBP
	2296	FOXC1	hsa-miR-222	55885	LMO3	2553	GABPB1
	2296	FOXC1	hsa-miR-222	55885	LMO3	4670	HNRNPM
	2296	FOXC1	hsa-miR-222	55885	LMO3	8861	LDB1
	2296	FOXC1	hsa-miR-222	55885	LMO3	23099	ZBTB43
	2296	FOXC1	hsa-miR-222	58508	MLL3	79447	C16ORF53
	2296	FOXC1	hsa-miR-222	58508	MLL3	22976	PAXIP1
	2296	FOXC1	hsa-miR-222	860	RUNX2	2113	ETS1
	2296	FOXC1	hsa-miR-222	860	RUNX2	3280	HES1
	2296	FOXC1	hsa-miR-222	860	RUNX2	4088	SMAD3
	2296	FOXC1	hsa-miR-222	22797	TFEC	4286	MITF
	2296	FOXC1	hsa-miR-222	23321	TRIM2	10018	BCL2L11
	2296	FOXC1	hsa-miR-222	23321	TRIM2	23043	TNIK
	2296	FOXC1	hsa-miR-222	23321	TRIM2	10477	UBE2E3
	2308	FOXO1	hsa-miR-222	22926	ATF6	4800	NFYA
	2308	FOXO1	hsa-miR-222	1390	CREM	5595	LOC100271831
	2308	FOXO1	hsa-miR-222	1629	DBT	192670	EIF2C4
	2308	FOXO1	hsa-miR-222	55885	LMO3	4670	HNRNPM
	2308	FOXO1	hsa-miR-222	58508	MLL3	3725	JUN
	2308	FOXO1	hsa-miR-222	860	RUNX2	3725	JUN
	2308	FOXO1	hsa-miR-222	860	RUNX2	4488	MSX2
	2308	FOXO1	hsa-miR-222	860	RUNX2	6662	SOX9
	2308	FOXO1	hsa-miR-222	22797	TFEC	4286	MITF
	2308	FOXO1	hsa-miR-222	23321	TRIM2	140885	SIRPA
	2308	FOXO1	hsa-miR-222	9686	VGLL4	7003	TEAD1
	3665	IRF7	hsa-miR-130a	1390	CREM	30818	KCNIP3
	3665	IRF7	hsa-miR-130a	3097	HIVEP2	23291	FBXW11
	3665	IRF7	hsa-miR-130a	3097	HIVEP2	7532	YWHAG
	3665	IRF7	hsa-miR-130a	3097	HIVEP2	7534	YWHAZ
	3665	IRF7	hsa-miR-130a	58508	MLL3	3725	JUN
	3665	IRF7	hsa-miR-130a	58508	MLL3	5929	RBBP5
	3665	IRF7	hsa-miR-130a	8634	RTCD1	6142	RPL18A
	3665	IRF7	hsa-miR-130a	8634	RTCD1	6147	RPL23A
	3665	IRF7	hsa-miR-130a	23321	TRIM2	10018	BCL2L11
	3665	IRF7	hsa-miR-130a	23321	TRIM2	10477	UBE2E3
	3665	IRF7	hsa-miR-130a	23321	TRIM2	148581	UBE2U
	3725	JUN	hsa-miR-9-5p	11160	ERLIN2	10613	ERLIN1
	3725	JUN	hsa-miR-9-5p	4790	NFKB1	3551	IKBKB
	3725	JUN	hsa-miR-9-5p	4790	NFKB1	4791	NFKB2
	3725	JUN	hsa-miR-9-5p	4790	NFKB1	4851	NOTCH1
	3725	JUN	hsa-miR-9-5p	9519	TBPL1	2957	GTF2A1
	4149	MAX	hsa-miR-181b	9915	ARNT2	6493	SIM2
	4149	MAX	hsa-miR-181b	6314	ATXN7	2648	KAT2A
	4149	MAX	hsa-miR-181b	6314	ATXN7	9135	RABEP1
	4149	MAX	hsa-miR-181b	6314	ATXN7	6881	TAF10
	4149	MAX	hsa-miR-181b	6314	ATXN7	7450	VWF
	4149	MAX	hsa-miR-181b	11083	DIDO1	6426	SFRS1
	4149	MAX	hsa-miR-181b	157570	ESCO2	3066	HDAC2
	4149	MAX	hsa-miR-181b	2120	ETV6	2313	FLI1
	4149	MAX	hsa-miR-181b	2120	ETV6	10524	KAT5
	4149	MAX	hsa-miR-181b	2222	FDFT1	8607	RUVBL1
	4149	MAX	hsa-miR-181b	2222	FDFT1	10285	SMNDC1
	4149	MAX	hsa-miR-181b	3224	HOXC8	1746	DLX2
	4149	MAX	hsa-miR-181b	3224	HOXC8	4487	MSX1
	4149	MAX	hsa-miR-181b	10644	IGF2BP2	56257	MEPCE
	4149	MAX	hsa-miR-181b	54891	INO80D	10445	MCRS1
	4149	MAX	hsa-miR-181b	54891	INO80D	8607	RUVBL1
	4149	MAX	hsa-miR-181b	1316	KLF6	10528	NOP56
	4149	MAX	hsa-miR-181b	27097	TAF5L	2648	KAT2A
	4149	MAX	hsa-miR-181b	27097	TAF5L	6881	TAF10
	4149	MAX	hsa-miR-181b	9519	TBPL1	2957	GTF2A1
	4205	MEF2A	hsa-miR-21-5p	225	ABCD2	5824	PEX19
	4205	MEF2A	hsa-miR-21-5p	1746	DLX2	4487	MSX1
	4205	MEF2A	hsa-miR-21-5p	1746	DLX2	4488	MSX2
	4205	MEF2A	hsa-miR-21-5p	55885	LMO3	2553	GABPB1
	4205	MEF2A	hsa-miR-21-5p	55885	LMO3	8861	LDB1
	4205	MEF2A	hsa-miR-21-5p	23012	STK38L	7529	YWHAB
	4783	NFIL3	hsa-miR-214	9915	ARNT2	604	BCL6
	4783	NFIL3	hsa-miR-214	80063	ATF7IP2	6667	SP1
	4783	NFIL3	hsa-miR-214	56970	ATXN7L3	6881	TAF10
	4783	NFIL3	hsa-miR-214	1408	CRY2	8864	PER2
	4783	NFIL3	hsa-miR-214	58190	CTDSP1	5430	POLR2A
	4783	NFIL3	hsa-miR-214	11083	DIDO1	6426	SFRS1
	4783	NFIL3	hsa-miR-214	8892	EIF2B2	4690	NCK1
	4783	NFIL3	hsa-miR-214	4286	MITF	5080	PAX6
	4783	NFIL3	hsa-miR-214	5292	PIM1	997	CDC34
	4783	NFIL3	hsa-miR-214	5292	PIM1	3320	HSP90AA2
	4783	NFIL3	hsa-miR-214	5292	PIM1	11335	LOC644101
	4783	NFIL3	hsa-miR-214	5292	PIM1	4772	NFATC1
	4783	NFIL3	hsa-miR-214	5292	PIM1	5515	PPP2CA
	4783	NFIL3	hsa-miR-214	9230	RAB11B	22841	RAB11FIP2
	4783	NFIL3	hsa-miR-214	8871	SYNJ2	6456	SH3GL2
	4783	NFIL3	hsa-miR-214	22906	TRAK1	8473	OGT
	4783	NFIL3	hsa-miR-214	22906	TRAK1	66008	TRAK2
	6667	SP1	hsa-miR-9-5p	8110	DPF3	2101	ESRRA
	6667	SP1	hsa-miR-9-5p	11160	ERLIN2	10613	ERLIN1
	6667	SP1	hsa-miR-9-5p	8968	HIST2H3A	3068	HDGF
	6667	SP1	hsa-miR-9-5p	10644	IGF2BP2	1025	CDK9
	6667	SP1	hsa-miR-9-5p	10644	IGF2BP2	56257	MEPCE
	6667	SP1	hsa-miR-9-5p	10644	IGF2BP2	4609	MYC
	6667	SP1	hsa-miR-9-5p	10644	IGF2BP2	22827	PUF60
	6667	SP1	hsa-miR-9-5p	688	KLF5	2932	GSK3B
	6667	SP1	hsa-miR-9-5p	688	KLF5	5914	RARA
	6667	SP1	hsa-miR-9-5p	688	KLF5	6418	SET
	6667	SP1	hsa-miR-9-5p	688	KLF5	11059	WWP1
	6667	SP1	hsa-miR-9-5p	4790	NFKB1	602	BCL3
	6667	SP1	hsa-miR-9-5p	4790	NFKB1	1051	CEBPB
	6667	SP1	hsa-miR-9-5p	4790	NFKB1	1869	E2F1
	6667	SP1	hsa-miR-9-5p	4790	NFKB1	2932	GSK3B
	6667	SP1	hsa-miR-9-5p	4790	NFKB1	9759	HDAC4
	6667	SP1	hsa-miR-9-5p	4790	NFKB1	10524	KAT5
	6667	SP1	hsa-miR-9-5p	4790	NFKB1	688	KLF5
	6667	SP1	hsa-miR-9-5p	4790	NFKB1	3839	KPNA3
	6667	SP1	hsa-miR-9-5p	4790	NFKB1	23054	NCOA6
	6667	SP1	hsa-miR-9-5p	4790	NFKB1	4791	NFKB2
	6667	SP1	hsa-miR-9-5p	4790	NFKB1	4792	NKBIA
	6667	SP1	hsa-miR-9-5p	4790	NFKB1	55922	NKRF
	6667	SP1	hsa-miR-9-5p	4790	NFKB1	4851	NOTCH1
	6667	SP1	hsa-miR-9-5p	4790	NFKB1	2908	NR3C1
	6667	SP1	hsa-miR-9-5p	4790	NFKB1	5970	RELA
	6667	SP1	hsa-miR-9-5p	4790	NFKB1	5971	RELB
	6667	SP1	hsa-miR-9-5p	4790	NFKB1	7536	SF1
	6667	SP1	hsa-miR-9-5p	4790	NFKB1	6774	STAT3
	6667	SP1	hsa-miR-9-5p	4790	NFKB1	6778	STAT6
	6667	SP1	hsa-miR-9-5p	4790	NFKB1	79155	TNIP2
	6667	SP1	hsa-miR-9-5p	4790	NFKB1	7538	ZFP36
	6667	SP1	hsa-miR-9-5p	114971	PTPMT1	5597	MAPK6
	6667	SP1	hsa-miR-9-5p	254225	RNF19	6613	SUMO3
	6667	SP1	hsa-miR-9-5p	9519	TBPL1	2957	GTF2A1
	6667	SP1	hsa-miR-9-5p	9519	TBPL1	11021	RAB35
	6667	SP1	hsa-miR-9-5p	9519	TBPL1	6878	TAF6
	6667	SP1	hsa-miR-9-5p	54532	USP53	642	BLMH
	6667	SP1	hsa-miR-9-5p	54532	USP53	27132	CPNE7
	6667	SP1	hsa-miR-9-5p	54532	USP53	2318	FLNC
	6667	SP1	hsa-miR-9-5p	54532	USP53	2885	GRB2
	6667	SP1	hsa-miR-9-5p	54532	USP53	3054	HCFC1
	6667	SP1	hsa-miR-9-5p	6940	ZNF354A	9759	HDAC4
	6720	SREBF1	hsa-miR-181a	6314	ATXN7	87	ACTN1
	6720	SREBF1	hsa-miR-181b	6314	ATXN7	87	ACTN1
	6720	SREBF1	hsa-miR-181a	6314	ATXN7	88	ACTN2
	6720	SREBF1	hsa-miR-181b	6314	ATXN7	88	ACTN2
	6720	SREBF1	hsa-miR-181a	6314	ATXN7	56970	ATXN7L3
	6720	SREBF1	hsa-miR-181b	6314	ATXN7	56970	ATXN7L3
	6720	SREBF1	hsa-miR-181a	6314	ATXN7	80321	CEP70
	6720	SREBF1	hsa-miR-181b	6314	ATXN7	80321	CEP70
	6720	SREBF1	hsa-miR-181a	6314	ATXN7	2202	EFEMP1
	6720	SREBF1	hsa-miR-181b	6314	ATXN7	2202	EFEMP1
	6720	SREBF1	hsa-miR-181a	6314	ATXN7	2896	GRN
	6720	SREBF1	hsa-miR-181b	6314	ATXN7	2896	GRN
	6720	SREBF1	hsa-miR-181a	6314	ATXN7	3714	JAG2
	6720	SREBF1	hsa-miR-181b	6314	ATXN7	3714	JAG2
	6720	SREBF1	hsa-miR-181a	6314	ATXN7	4147	MATN2
	6720	SREBF1	hsa-miR-181b	6314	ATXN7	4147	MATN2
	6720	SREBF1	hsa-miR-181a	6314	ATXN7	54776	PPP1R12C
	6720	SREBF1	hsa-miR-181b	6314	ATXN7	54776	PPP1R12C
	6720	SREBF1	hsa-miR-181a	6314	ATXN7	9135	RABEP1
	6720	SREBF1	hsa-miR-181b	6314	ATXN7	9135	RABEP1
	6720	SREBF1	hsa-miR-181a	6314	ATXN7	7186	TRAF2
	6720	SREBF1	hsa-miR-181b	6314	ATXN7	7186	TRAF2
	6720	SREBF1	hsa-miR-181a	11083	DIDO1	6426	SFRS1
	6720	SREBF1	hsa-miR-181b	11083	DIDO1	6426	SFRS1
	6720	SREBF1	hsa-miR-181a	11083	DIDO1	11059	WWP1
	6720	SREBF1	hsa-miR-181b	11083	DIDO1	11059	WWP1
	6720	SREBF1	hsa-miR-181a	30001	ERO1L	5034	P4HB
	6720	SREBF1	hsa-miR-181b	30001	ERO1L	5034	P4HB
	6720	SREBF1	hsa-miR-181a	2120	ETV6	26233	FBXL6
	6720	SREBF1	hsa-miR-181b	2120	ETV6	26233	FBXL6
	6720	SREBF1	hsa-miR-181a	2120	ETV6	2313	FLI1
	6720	SREBF1	hsa-miR-181b	2120	ETV6	2313	FLI1
	6720	SREBF1	hsa-miR-181a	2222	FDFT1	308	ANXA5
	6720	SREBF1	hsa-miR-181b	2222	FDFT1	308	ANXA5
	6720	SREBF1	hsa-miR-181a	2222	FDFT1	9051	PSTPIP1
	6720	SREBF1	hsa-miR-181b	2222	FDFT1	9051	PSTPIP1
	6720	SREBF1	hsa-miR-181a	2222	FDFT1	10856	RUVBL2
	6720	SREBF1	hsa-miR-181b	2222	FDFT1	10856	RUVBL2
	6720	SREBF1	hsa-miR-181a	3224	HOXC8	7832	BTG2
	6720	SREBF1	hsa-miR-181b	3224	HOXC8	7832	BTG2
	6720	SREBF1	hsa-miR-181a	3224	HOXC8	1749	DLX5
	6720	SREBF1	hsa-miR-181b	3224	HOXC8	1749	DLX5
	6720	SREBF1	hsa-miR-181a	3224	HOXC8	4091	SMAD6
	6720	SREBF1	hsa-miR-181b	3224	HOXC8	4091	SMAD6
	6720	SREBF1	hsa-miR-181a	10644	IGF2BP2	56257	MEPCE
	6720	SREBF1	hsa-miR-181b	10644	IGF2BP2	56257	MEPCE
	6720	SREBF1	hsa-miR-181a	54891	INO80D	54617	INO80
	6720	SREBF1	hsa-miR-181b	54891	INO80D	54617	INO80
	6720	SREBF1	hsa-miR-181a	54891	INO80D	10445	MCRS1
	6720	SREBF1	hsa-miR-181b	54891	INO80D	10445	MCRS1
	6720	SREBF1	hsa-miR-181a	54891	INO80D	10856	RUVBL2
	6720	SREBF1	hsa-miR-181b	54891	INO80D	10856	RUVBL2
	6720	SREBF1	hsa-miR-181a	54891	INO80D	51377	UCHL5
	6720	SREBF1	hsa-miR-181b	54891	INO80D	51377	UCHL5
	6720	SREBF1	hsa-miR-181a	1316	KLF6	9314	KLF4
	6720	SREBF1	hsa-miR-181b	1316	KLF6	9314	KLF4
	6720	SREBF1	hsa-miR-181a	9477	MED20	219541	MED19
	6720	SREBF1	hsa-miR-181b	9477	MED20	219541	MED19
	6720	SREBF1	hsa-miR-181a	9477	MED20	23091	ZC3H13
	6720	SREBF1	hsa-miR-181b	9477	MED20	23091	ZC3H13
	6720	SREBF1	hsa-miR-181a	63898	SH2D4A	5500	PPP1CB
	6720	SREBF1	hsa-miR-181b	63898	SH2D4A	5500	PPP1CB
	6720	SREBF1	hsa-miR-181a	80176	SPSB1	7157	TP53
	6720	SREBF1	hsa-miR-181b	80176	SPSB1	7157	TP53
	6720	SREBF1	hsa-miR-181a	27097	TAF5L	56970	ATXN7L3
	6720	SREBF1	hsa-miR-181b	27097	TAF5L	56970	ATXN7L3
	6720	SREBF1	hsa-miR-181a	27097	TAF5L	7157	TP53
	6720	SREBF1	hsa-miR-181b	27097	TAF5L	7157	TP53
	6720	SREBF1	hsa-miR-181a	9519	TBPL1	2957	GTF2A1
	6720	SREBF1	hsa-miR-181b	9519	TBPL1	2957	GTF2A1
	6720	SREBF1	hsa-miR-181a	9519	TBPL1	11021	RAB35
	6720	SREBF1	hsa-miR-181b	9519	TBPL1	11021	RAB35
	6720	SREBF1	hsa-miR-181a	22906	TRAK1	8473	OGT
	6720	SREBF1	hsa-miR-181b	22906	TRAK1	8473	OGT
	6722	SRF	hsa-miR-21-5p	225	ABCD2	215	ABCD1
	6722	SRF	hsa-miR-130a	1390	CREM	9457	FHL5
	6722	SRF	hsa-miR-130a	1390	CREM	3065	HDAC1
	6722	SRF	hsa-miR-21-5p	1746	DLX2	3224	HOXC8
	6722	SRF	hsa-miR-130a	57520	HECW2	7157	TP53
	6722	SRF	hsa-miR-130a	27252	KLHL20	58	ACTA1
	6722	SRF	hsa-miR-21-5p	55885	LMO3	4670	HNRNPM
	6722	SRF	hsa-miR-21-5p	5606	MAP2K3	4092	SMAD7
	6722	SRF	hsa-miR-130a	58508	MLL3	79577	CDC73
	6722	SRF	hsa-miR-130a	58508	MLL3	3725	JUN
	6722	SRF	hsa-miR-130a	58508	MLL3	7403	KDM6A
	6722	SRF	hsa-miR-130a	4642	MYO1D	53918	PELO
	6722	SRF	hsa-miR-21-5p	6909	TBX2	1958	EGR1
	6722	SRF	hsa-miR-130a	23321	TRIM2	140885	SIRPA
	6774	STAT3	hsa-miR-21-5p	55885	LMO3	11007	CCDC85D
	6774	STAT3	hsa-miR-21-5p	55885	LMO3	4188	MDFI
	6774	STAT3	hsa-miR-21-5p	55885	LMO3	222546	RFX6
	6774	STAT3	hsa-miR-21-5p	5606	MAP2K3	4092	SMAD7
	6774	STAT3	hsa-miR-21-5p	6909	TBX2	1958	EGR1
	6929	TCF3	hsa-miR-9-5p	8110	DPF3	2101	ESRRA
	6929	TCF3	hsa-miR-9-5p	8968	HIST2H3A	3068	HDGF
	6929	TCF3	hsa-miR-9-5p	10644	IGF2BP2	4609	MYC
	6929	TCF3	hsa-miR-9-5p	688	KLF5	1387	CREBBP
	6929	TCF3	hsa-miR-9-5p	688	KLF5	55294	FBXW7
	6929	TCF3	hsa-miR-9-5p	688	KLF5	3066	HDAC2
	6929	TCF3	hsa-miR-9-5p	4790	NFKB1	602	BCL3
	6929	TCF3	hsa-miR-9-5p	4790	NFKB1	1051	CEBPB
	6929	TCF3	hsa-miR-9-5p	4790	NFKB1	1499	CTNNB1
	6929	TCF3	hsa-miR-9-5p	4790	NFKB1	1869	E2F1
	6929	TCF3	hsa-miR-9-5p	4790	NFKB1	3066	HDAC2
	6929	TCF3	hsa-miR-9-5p	4790	NFKB1	4066	LYL1
	6929	TCF3	hsa-miR-9-5p	4790	NFKB1	4221	MEN1
	6929	TCF3	hsa-miR-9-5p	4790	NFKB1	8648	NCOA1
	6929	TCF3	hsa-miR-9-5p	4790	NFKB1	9611	NCOR1
	6929	TCF3	hsa-miR-9-5p	4790	NFKB1	4792	NKBIA
	6929	TCF3	hsa-miR-9-5p	4790	NFKB1	6256	RXRA
	6929	TCF3	hsa-miR-9-5p	4790	NFKB1	6778	STAT6
	6929	TCF3	hsa-miR-9-5p	9519	TBPL1	2957	GTF2A1
	6929	TCF3	hsa-miR-9-5p	9519	TBPL1	10654	PMVK
	6929	TCF3	hsa-miR-9-5p	9519	TBPL1	11021	RAB35
	6929	TCF3	hsa-miR-9-5p	54532	USP53	27132	CPNE7
	6929	TCF3	hsa-miR-9-5p	54532	USP53	2318	FLNC
	6929	TCF3	hsa-miR-9-5p	54532	USP53	2885	GRB2
	7528	YY1	hsa-miR-130a	178	AGL	378884	NHLRC1
	7528	YY1	hsa-miR-130a	178	AGL	5563	PRKAA2
	7528	YY1	hsa-miR-130a	1390	CREM	5595	LOC100271831
	7528	YY1	hsa-miR-130a	3097	HIVEP2	8945	BTRC
	7528	YY1	hsa-miR-130a	3097	HIVEP2	7531	YWHAE
	7528	YY1	hsa-miR-130a	3097	HIVEP2	7532	YWHAG
	7528	YY1	hsa-miR-130a	27252	KLHL20	2634	GBP2
	7528	YY1	hsa-miR-130a	27252	KLHL20	5300	PIN1
	7528	YY1	hsa-miR-130a	58508	MLL3	430	ASCL2
	7528	YY1	hsa-miR-130a	58508	MLL3	9070	ASH2L
	7528	YY1	hsa-miR-130a	58508	MLL3	23054	NCOA6
	7528	YY1	hsa-miR-130a	58508	MLL3	5929	RBBP5
	7528	YY1	hsa-miR-130a	8634	RTCD1	10295	BCKDK
	7528	YY1	hsa-miR-130a	22797	TFEC	7030	TFE3
	7528	YY1	hsa-miR-130a	23321	TRIM2	3093	UBE2K
	7528	YY1	hsa-miR-130a	9686	VGLL4	7003	TEAD1
	6935	ZEB1	hsa-miR-214	9915	ARNT2	266743	NPAS4
	6935	ZEB1	hsa-miR-214	80063	ATF7IP2	6667	SP1
	6935	ZEB1	hsa-miR-214	56970	ATXN7L3	6881	TAF10
	6935	ZEB1	hsa-miR-214	1408	CRY2	5536	PPP5C
	6935	ZEB1	hsa-miR-214	11083	DIDO1	11059	WWP1
	6935	ZEB1	hsa-miR-214	2806	GOT2	56998	CTNNBIP1
	6935	ZEB1	hsa-miR-214	2806	GOT2	2745	GLRX
	6935	ZEB1	hsa-miR-214	9477	MED20	9968	MED12
	6935	ZEB1	hsa-miR-214	4286	MITF	2353	FOS
	6935	ZEB1	hsa-miR-214	4286	MITF	5080	PAX6
	6935	ZEB1	hsa-miR-214	4286	MITF	7030	TFE3
	6935	ZEB1	hsa-miR-214	5141	PDE4A	5576	PRKAR2A
	6935	ZEB1	hsa-miR-214	5292	PIM1	991	CDC20
	6935	ZEB1	hsa-miR-214	5292	PIM1	997	CDC34
	6935	ZEB1	hsa-miR-214	5292	PIM1	1026	CDKN1A
	6935	ZEB1	hsa-miR-214	5292	PIM1	5515	SPDYA
	6935	ZEB1	hsa-miR-214	9230	RAB11B	80223	RAB11FIP1
	6935	ZEB1	hsa-miR-214	8871	SYNJ2	50618	ITSN2
	6935	ZEB1	hsa-miR-214	8871	SYNJ2	2810	SFN
	6935	ZEB1	hsa-miR-214	8871	SYNJ2	6456	SH3GL2
	6935	ZEB1	hsa-miR-214	9519	TBPL1	3313	HSPA9
	6935	ZEB1	hsa-miR-214	9519	TBPL1	11021	RAB35
	6935	ZEB1	hsa-miR-214	22906	TRAK1	8473	OGT
	7546	ZIC2	hsa-miR-9-5p	8110	DPF3	2101	ESRRA
	7546	ZIC2	hsa-miR-9-5p	11160	ERLIN2	3156	HMGCR
	7546	ZIC2	hsa-miR-9-5p	11160	ERLIN2	3638	INSIG1
	7546	ZIC2	hsa-miR-9-5p	11160	ERLIN2	84447	SYVN1
	7546	ZIC2	hsa-miR-9-5p	8968	HIST2H3A	5252	PHF1
	7546	ZIC2	hsa-miR-9-5p	10644	IGF2BP2	56257	MEPCE
	7546	ZIC2	hsa-miR-9-5p	688	KLF5	1387	CREBBP
	7546	ZIC2	hsa-miR-9-5p	688	KLF5	6418	SET
	7546	ZIC2	hsa-miR-9-5p	688	KLF5	7706	TRIM25
	7546	ZIC2	hsa-miR-9-5p	4790	NFKB1	1999	ELF3
	7546	ZIC2	hsa-miR-9-5p	4790	NFKB1	10014	HDAC5
	7546	ZIC2	hsa-miR-9-5p	4790	NFKB1	23054	NCOA6
	7546	ZIC2	hsa-miR-9-5p	4790	NFKB1	4791	NFKB2
	7546	ZIC2	hsa-miR-9-5p	4790	NFKB1	64332	NFKBIZ
	7546	ZIC2	hsa-miR-9-5p	4790	NFKB1	4792	NKBIA
	7546	ZIC2	hsa-miR-9-5p	4790	NFKB1	55922	NKRF
	7546	ZIC2	hsa-miR-9-5p	4790	NFKB1	4851	NOTCH1
	7546	ZIC2	hsa-miR-9-5p	4790	NFKB1	5966	REL
	7546	ZIC2	hsa-miR-9-5p	4790	NFKB1	6778	STAT6
	7546	ZIC2	hsa-miR-9-5p	4790	NFKB1	7538	ZFP36
	7546	ZIC2	hsa-miR-9-5p	9397	NMT2	5590	PRKCZ
	7546	ZIC2	hsa-miR-9-5p	54532	USP53	642	BLMH
	7546	ZIC2	hsa-miR-9-5p	54532	USP53	3054	HCFC1
