# Supplementary material for: How MicroRNA and Transcription Factor Co-regulatory Networks Affect Osteosarcoma Cell Proliferation
Source: PLoS Comput Biol. 2013 Aug 29;9(8):e1003210. doi: 10.1371/journal.pcbi.1003210 (PMC3757060; doi:10.1371/journal.pcbi.1003210)
Supplement: Table S6 — MicroRNA and TF co-regulatory network hubs. The table holds the node degree and betweenness parameters of hub genes within the co-regulatory network of C1 and C2 for each node type. (XLS) [file pcbi.1003210.s013.xls]

## Sheet: TableS6
Cluster	GeneID	Node type	Symbol	Node degree	Betweenness
C1	6667	TF	SP1	48	0.17741893
	6720	TF	SREBF1	41	0.12396839
	7546	TF	ZIC2	33	0.06978509
	1385	TF	CREB1	33	0.05576932
	1386	TF	ATF2	29	0.05398442
	6935	TF	ZEB1	28	0.1064143
	1874	TF	E2F4	25	0.05763605
	hsa-miR-214	miR	miR-214	28	0.08132033
	hsa-miR-181b	miR	miR-181b	27	0.05242576
	hsa-miR-181a	miR	miR-181a	25	0.03696765
	4790	primTargets	NFKB1	43	0.07578061
	6314	primTargets	ATXN7	17	0.01636417
	9519	primTargets	TBPL1	14	0.02370687
	58508	primTargets	MLL3	13	0.02554469
	688	primTargets	KLF5	13	0.01027095
	55885	primTargets	LMO3	13	0.01807464
	5292	primTargets	PIM1	12	0.00900629
	54891	primTargets	INO80D	11	0.01483258
	2957	secTargets	GTF2A1	10	0.06459316
	11160	primTargets	ERLIN2	10	0.00382019
	3097	primTargets	HIVEP2	10	0.01422488
	10644	primTargets	IGF2BP2	10	0.01891143
	22926	primTargets_TF	ATF6	9	0.00709709
	54532	primTargets	USP53	9	0.00236026
	23321	primTargets	TRIM2	9	0.00886715
C2	6667	TF	SP1	158	0.16787632
	4205	TF	MEF2A	111	0.13343624
	4609	TF	MYC	104	0.12391652
	3725	primTargets_TF	JUN	101	0.07225865
	2908	TF	NR3C1	97	0.11944031
	5978	primTargets_TF	REST	97	0.05561713
	1385	TF	CREB1	96	0.05511636
	1958	TF	EGR1	92	0.05452056
	7546	TF	ZIC2	92	0.05972736
	hsa-miR-9-5p	miR	miR-9-5p	38	0.02039144
	hsa-miR-214	miR	miR-214	32	0.02796729
	hsa-miR-138	miR	miR-138	30	0.02619631
	3725	primTargets_TF	JUN	101	0.07225865
	5978	primTargets_TF	REST	97	0.05561713
	25942	primTargets	SIN3A	82	0.07218517
	604	primTargets	BCL6	59	0.04149359
	2932	primTargets	GSK3B	52	0.03373155
	3728	primTargets	JUP	36	0.01576371
	1499	primTargets	CTNNB1	35	0.02281751
	6622	primTargets	SNCA	31	0.00646668
	3280	primTargets	HES1	26	0.01340105
	5914	primTargets	RARA	25	0.00561338
	8543	primTargets	LMO4	25	0.01791193
	382	primTargets	ARF6	22	0.00613383
	65264	primTargets	UBE2Z	20	0.00503506
	5159	primTargets	PDGFRB	19	0.00180111
	4851	primTargets	NOTCH1	19	0.00640295
	7414	primTargets	VCL	19	0.00826719
	1874	primTargets_TF	E2F4	18	0.0042481
	5071	primTargets	PARK2	18	0.00564837
	5663	primTargets	PSEN1	18	0.00625975
	5295	primTargets	PIK3R1	17	0.00726814
	773	secTargets	CACNA1A	14	0.0066469
	6934	primTargets	TCF7L2	14	0.0084112
	4641	primTargets	MYO1C	14	0.00281425
	154796	primTargets	AMOT	14	0.0064399
	7048	primTargets	TGFBR2	13	0.00144714
	2690	primTargets	GHR	13	0.00341657
	4092	secTargets	SMAD7	12	0.00267726
	6513	primTargets	SLC2A1	12	0.00368869
	10451	primTargets	VAV3	12	0.00473612
	2885	secTargets	GRB2	11	0.00440686
	7704	secTargets	ZBTB16	11	0.0047474
	9759	secTargets	HDAC4	11	0.00206952
	255877	secTargets	BCL6B	11	0.00295048
